# Supplementary material for: Use of Lung Ultrasound in the New Definitions of Acute Respiratory Distress Syndrome Increases the Occurrence Rate of Acute Respiratory Distress Syndrome
Source: PubMed Central journal article supplement (PMC10793806; doi:10.1097/ccm.0000000000006118), 2023-11-13

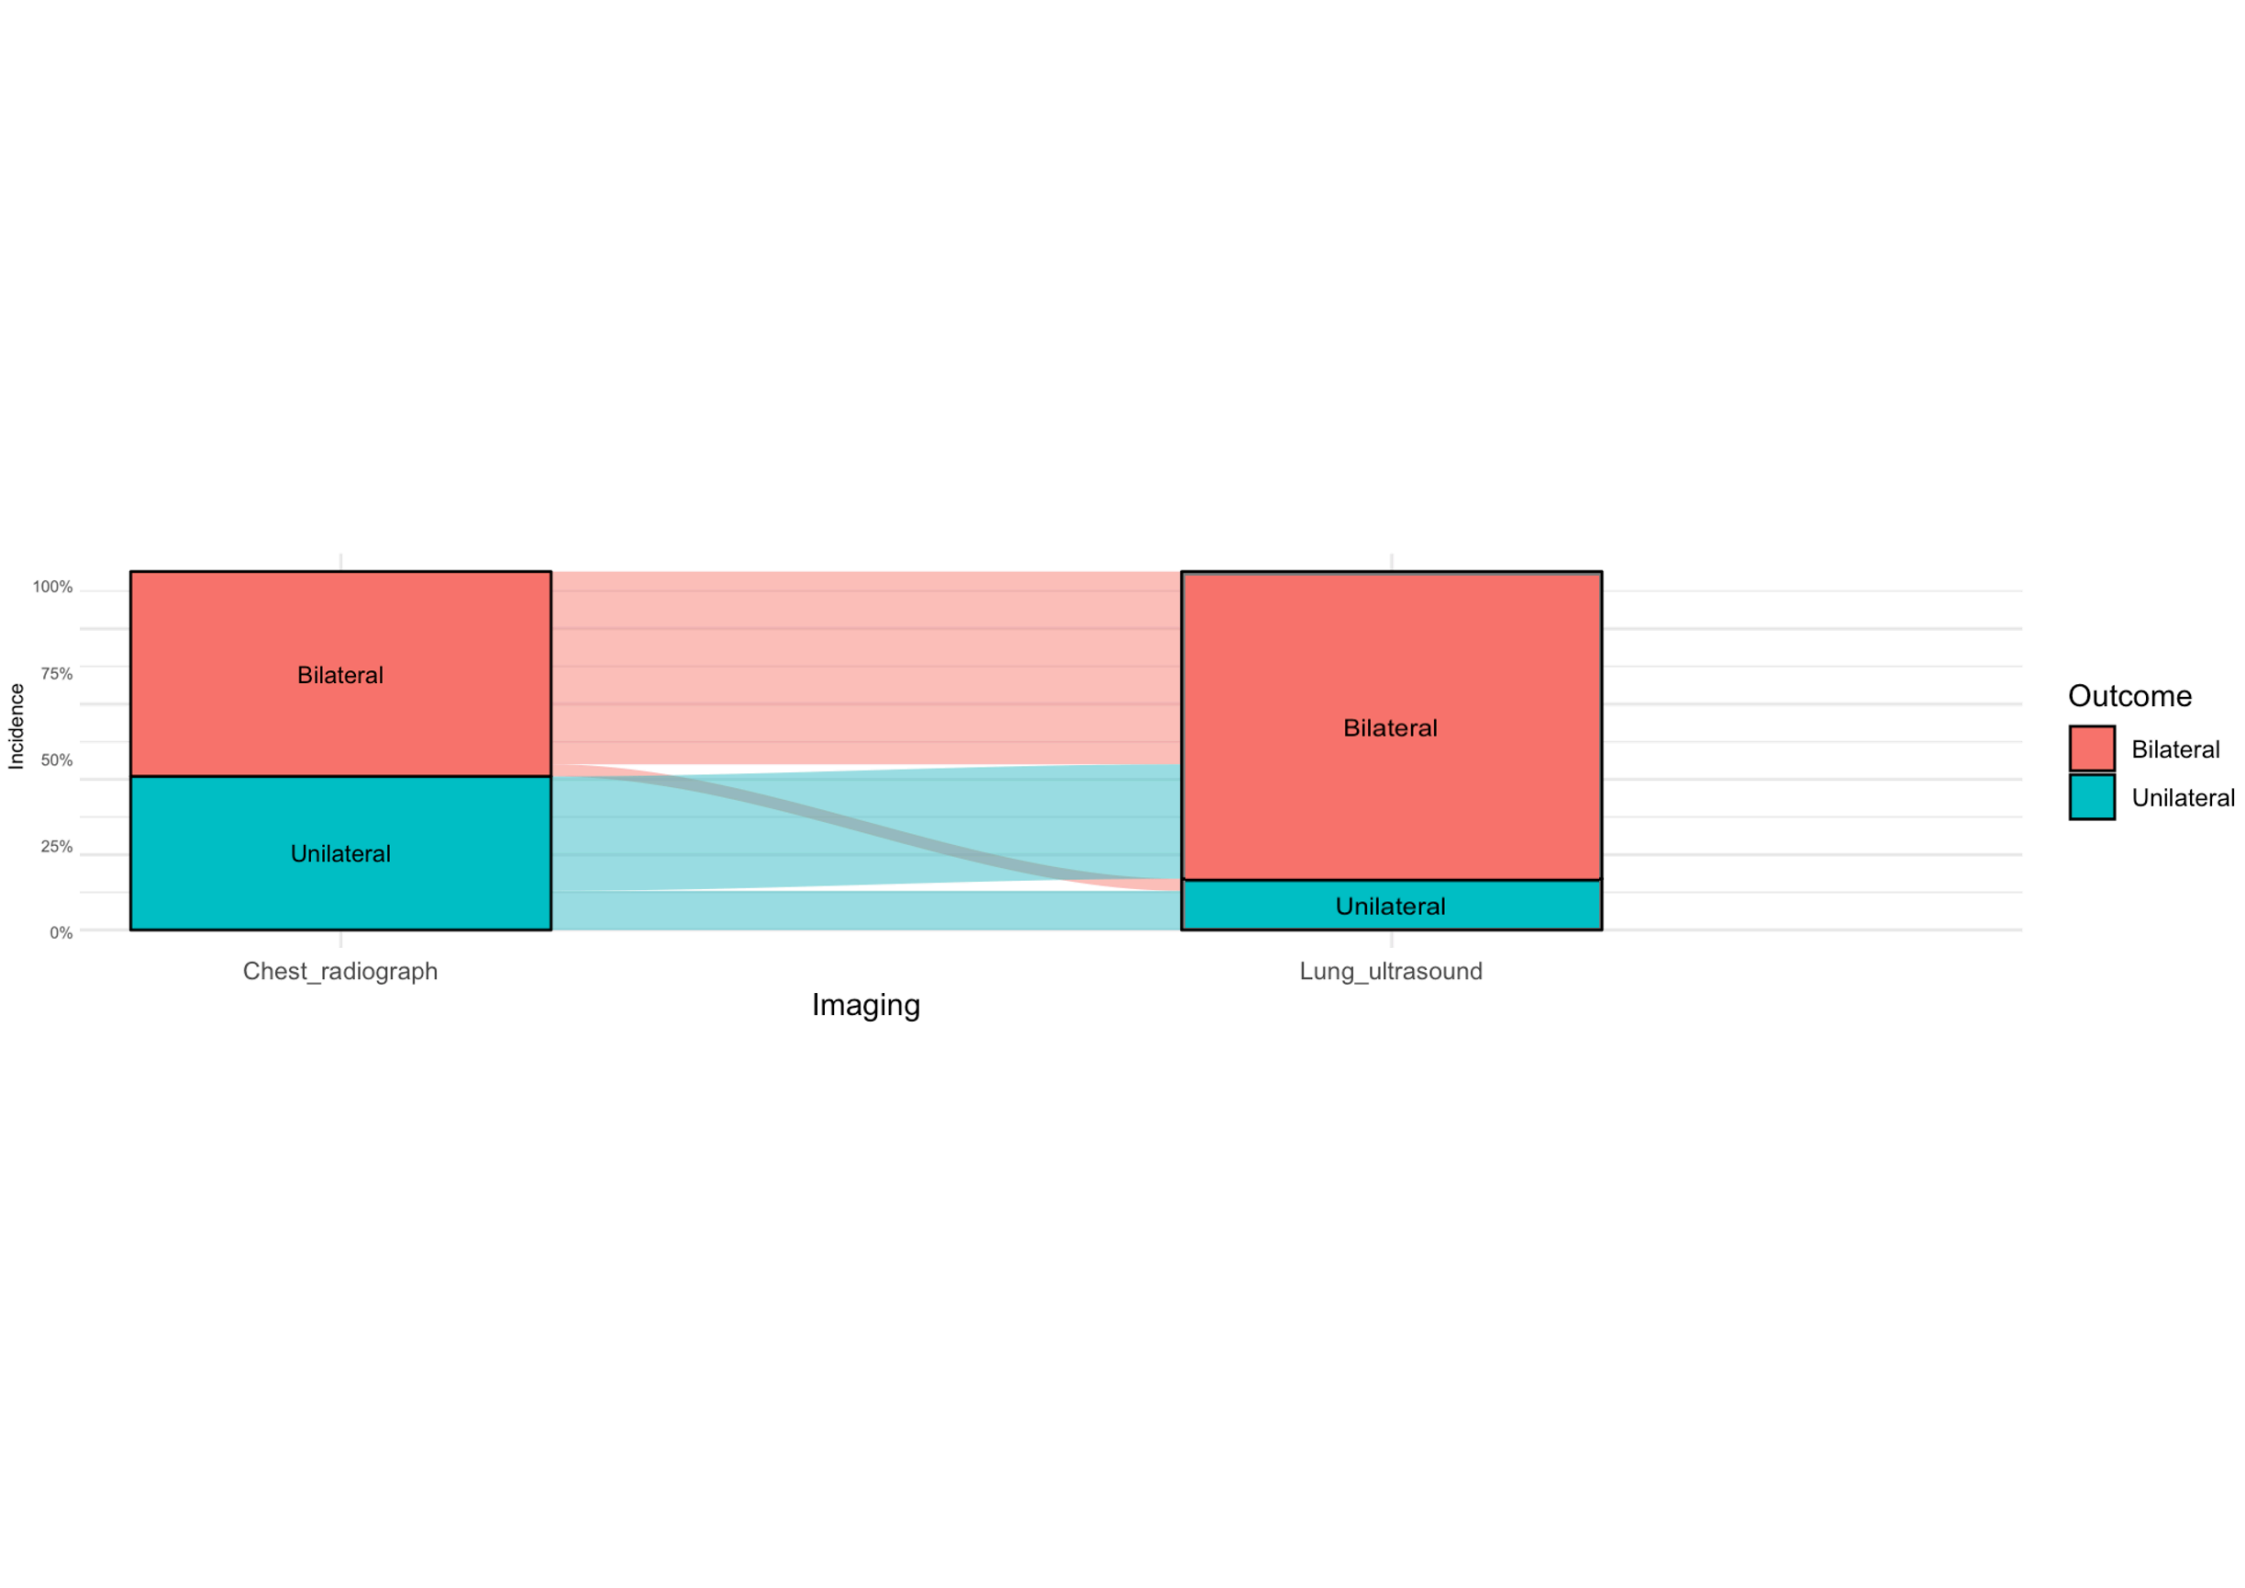

Supplement: ccm-52-e100-s001.pdf [file ccm-52-e100-s001.pdf]
